# Supplementary material
Source: HighWire-hosted journal article supplement (https://bmjopen.bmj.com/content/15/3/e092525)
Supplement: inline-supplementary-material-3 [file inline-supplementary-material-3.xlsx]

## Sheet: S2 Table
Study ID	First author, Year	Article aim	Country where the collaboration was executed	Collaboration subject	Years when collaboration was executed	Intensity of collaboration among LA and CSO	Additional actors in the collaboration	Collaboration activities (execution phase)
Mohamed 2021	Mohamed 2021	In this communication, the Mycetoma Research Center (MRC), University of Khartoum,WHO Collaborating Center on Mycetoma, shares its experience in field surgery for mycetoma.	Sudan	Infectious disease	2013-2020	Cooperation	Academic/Research Community representatives	Allocate resources Support Exchange information/knowledge Train
Maluka 2018	Maluka 2018	This paper reports on the design and implementation of SAs between local governments and NSPs for the provision of primary health care services in Tanzania.	Tanzania	Other	Not reported	Coordination	Government agencies Service providers Additional civil society organizations Community representatives	Allocate resources Establishing strategic and operational groups Gather data Exchange information/knowledge
Lee 2018	Lee 2018	We describe how Christian Friends of Korea (CFK), a non-governmental organization (NGO) based in the United States works alongside the North Korean Ministry of Public Health (MoPH) to fight diseases such as chronic hepatitis B (CHB), treating patients and advocating for their needs.	North Korea	Infectious disease	Not reported	Not possible to judge	Government agencies Additional civil society organizations	Allocate resources Utilizing agreements/contracts Establishing working plans Exchange information/knowledge
LeLoup 2009	LeLoup 2009	We studied how decentralized approaches to the HIV/AIDS epidemic in Brazil addressed the new trends of the epidemic, highlighting positive effects and difficulties, and make recommendations for Brazilian policymakers and to other low- and middle-income countries.	Brazil	Infectious disease	Not reported	Cooperation	Service providers Other actors	Allocate resources Support Exchange information/knowledge
Zukoski 2001	Zukoski 2001	Not reported	USA	Living conditions/lifestyle habits	Not reported	Cooperation	Service providers	Allocate resources Establishing working plans Support Exchange information and knowledge
Young 2006	Young 2006	This article describes why and how the 5 HCGNE extended their influence in nursing education, practice, and research by collaborating with other schools, community agencies, corporations, and government.	USA	Other	Not reported	Not possible to judge	Academic/Research Service provider	Establishing strategic and operational groups Establishing working plans
Yagub 2014	Yagub 2014	Examine the existing collaboration between government and NGOs in curative health service delivery; Identify the challenges that affect their collaboration.	Sudan	Other	Not reported	Coordination	Government agencies Additional civil society organizations Companies Other actors	Allocate resources Establishing strategic and operational groups Establishing working plans Gather data Exchange information/knowledge
Wynn 2006	Wynn 2006	The purpose of this paper is two-fold: 1) to describe the processes involved in building and maintaining the REACH 2010 Alabama Breast and Cervical Cancer Control Coalition (ABCCCC) and 2) to highlight the lessons learned from this venture.	USA	Non-communicable disease	1999-2006	Collaboration	Government agencies Academic/Research	Allocate resources Utilizing agreements/contracts Establishing working plans Exchange information/knowledge
Wood 2015	Wood 2015	Document the implementation of a government school-based sexuality education programme, Family Life and HIV Education (FLHE), in four states in Nigeria, where non-governmental organisations committed to sexual and reproductive rights and girls’ empowerment have played a critical role in teacher education and training.	Nigeria	Maternal, adolescent, reproductive and child health	Not reported	Not possible to judge	Government agencies Service providers	Allocate resources
Velasquez 2011	Velasquez 2011	Not reported	Bolivia	Living conditions/lifestyle habits	Not reported	Coordination	Community representatives	Allocate resources Utilizing agreements/contracts Gather data Exchange information/knowledge Train
Vassallo 2021	Vassallo 2021	The aim of this research is to 1: Investigate the changes in CMNs, health self-efficacy and health behaviours in a gender-sensitized health behavior intervention. 2: Investigate whether changes were sustained at a six month follow up from the program.	Australia	Living conditions/lifestyle habits	2016-2019	Coordination	Service providers Other actors	Allocate resources Exchange information/knowledge Train
Tsui 2012	Tsui 2012	In this report, we assess the degree to which these goals were achieved, and explore the organizational and program characteristics that contributed to or undermined success.	USA	Living conditions/lifestyle habits	2008-2010	Cooperation	Academic/Research	Allocate resources Establishing working plans Gather data Exchange information/knowledge
Topping 1997	Topping 1997	Is to describe the successful development of a rural HIV/AIDS alliance and clinic.	USA	Infectious disease	1990-1995	Collaboration	Government agencies Academic/Research Service providers Other actors	Allocate resources Establishing strategic and operational groups
Suva 2022	Suva 2022	This article illustrates a case study of how immigrant-serving institutions in Calgary, Alberta in Canada worked with crisis response institutions to respond together to the COVID-19 pandemic, via the Calgary East Zone Newcomers Collaborative (CENC).	Canada	Infectious disease	2020-2021	Coordination		Allocate resources Gather data Exchange information/knowledge
Stivers 1994	Stivers 1994	Not reported	USA	Living conditions/lifestyle habits	1989-Ongoing at time of publication	Collaboration	Government agencies Academic/Research Service providers Additional civil society organizations Other actors	Allocate resources Establishing strategic and operational groups Establishing working plans Support Exchange information/knowledge
SjogrenForss 2021	Sjögren Forss 2021, Avery 2022	Sjögren Forss 2021: The aim of this study was to explore how the penta-helix collaboration worked from the perspectives of all partners, including the citizens. Avery 2022: This paper presents some of the findings from a 3-year programme in a neighbourhood in the outskirts of Malmö, Sweden, with a large proportion of inhabitants with an immigrant background. While programme outcomes were assessed…	Sweden	Living conditions/lifestyle habits	2016-2019	Collaboration	Academic/Research Service providers Companies Other actors	Allocate resources Establishing strategic and operational groups Establishing working plans Gather data Exchange information/knowledge Train
Sivhaga 2012	Sivhaga 2012	(The African Medical and Research Foundation implemented an integrated c-IMCI and child survival project.) This paper reports the organization’s experience in the project.	South Africa	Maternal, adolescent, reproductive and child health	2008-2011	Coordination	Government agencies Service providers Additional civil society organizations Community representatives Other actors	Establishing strategic and operational groups Gather data Exchange information/knowledge Train
Singh 2021	Singh 2021	Not reported	India	Other	2013-2019	Coordination	Government agencies Academic/Research	Establishing strategic and operational groups Establishing working plans Gather data Support Exchange information/knowledge Train
Shelton 2020	Shelton 2020	Not reported	UK	Maternal, adolescent, reproductive and child health	Not reported	Coordination		Utilizing agreements/contracts Establishing working plans Exchange information/knowledge
Shaw 2013	Shaw 2013	To examine the work of commissioning care for people with long-term conditions and the factors inhibiting or facilitating commissioners making service change.	UK	Other	Not reported	Cooperation	Service providers Additional civil society organizations Other actors	Establishing working plans Gather data Exchange information/knowledge
Sequeira D'Mello 2021	Sequeira D'Mello 2021; 2020	Sequeira D'Mello 2021: Not reported Sequeira D'Mello 2020: This descriptive case study of the CCBRT multi-level NOC in Dar es Salaam uses programmatic documentation provided by CCBRT and interviews with key stakeholders to detail the wide-ranging efforts made to build and maintain the CCBRT NOC.	Tanzania	Maternal, adolescent, reproductive and child health	2010-2019	Collaboration	Government agencies Academics/Research Service providers Additional civil society organizations Community representatives	Allocate resources Utilizing agreements/contracts Establishing working plans Gather data Support Exchange information/knowledge Train
Renju 2010	Renju 2010	This paper presents the results of a series of evaluations that were conducted by an operational research team, which document and explain the scale-up of an ASRH intervention through a partnership.	Tanzania	Maternal, adolescent, reproductive and child health	2004-2008	Collaboration		Allocate resources Utilizing agreements/contracts Establishing working plans Support Exchange information/knowledge Train
Pierre 2020	Pierre 2020	To explore facilitators and barriers to developing and sustaining collaboration among New York City Department of Health and Mental Hygiene’s Neighborhood Health Action Centers and co-located partners, who share information and decision making through a Governance Council structure of representative members.	USA	Living conditions/lifestyle habits	Not reported	Coordination		Allocate resources Utilizing agreements/contracts Establishing strategic and operational groups Exchange information/knowledge
Peek 2007	Peek 2007	Not reported	USA	Non-communicable disease	Not reported	Cooperation	Academic/Research Additional civil society organizations Community representatives	Allocate resources Gather data Support Train
Pawinski 2006	Pawinski 2006	Not reported	South Africa	Infectious disease	Not reported	Cooperation	Academic/Research Additional civil society organizations Companies Other actors	Allocate resources Establishing strategic and operational groups Establishing working plans Gather data
Parsons 2022	Parsons 2022	The aim is to clarify and solidify the discourse around food policy coordination through focusing on the degree of food policy coordination.	UK	Other	Not reported	Cooperation	Government agencies	Exchange information/knowledge
Orobaton 2007	Orobaton 2007	This paper focuses on how the program (The Uganda Program for Human and Holistic Development (UPHOLD) addressed fragmentation to improve service delivery in the health sector.	Uganda	Infectious disease	Not reported	Coordination	Additional civil society organizations Companies	Allocate resources Utilizing agreements/contracts Gather data Support Exchange information/knowledge Train
Ohnishi 2009	Ohnishi 2009	The objective of the present study was to evaluate the capacity development and feasibility to realize a community-based environmental hygiene program both qualitatively and quantitatively through the coordination process of a training workshop.	Nigeria	Infectious disease	2003	Cooperation	Additional civil society organizations Companies Other actors	Allocate resources Establishing working plans Exchange information/knowledge Train
Ng'ang'a 2021	Ng'ang'a 2021	This paper present a project report on a participatory integrated vector management (IVM) project implemented to mitigate malaria in a rural area, western Kenya, from 2016 to 2018.	Kenya	Infectious disease	2016-2018	Coordination	Servie providers	Allocate resources Establishing working plans Gather data Exchange information/knowledge Train
Mumby 2012	Mumby 2012	This paper reports an evaluation of the effectiveness of CHANT, using a combination of quantitative and qualitative methods with a view to informing future commissioning, design and delivery of services for people with aphasia.	UK	Non-communicable disease	Not reported	Coordination	Government agencies Academic/Research Other actors	Allocate resources Establishing strategic and operational groups
Mkoka 2014	Mkoka 2014	To explore the experiences and perceptions of CHMT in working with multiple partners while illuminating some governance aspects that affect implementation of EmOC at the district level.	Tanzania	Maternal, adolescent, reproductive and child health	Not reported	Cooperation	Government agencies Additional civil society organizations Community representatives Other actors	Allocate resources Establishing strategic and operational groups Establishing working plans Support Exchange information/knowledge
McHale 2020	McHale 2020	To explore the views and experiences of a range of professionals involved in the establishment of GHPs, in order to gain insight of the influences on the establishment of pathways to promote green health.	UK	Living conditions/lifestyle habits	Not reported	Cooperation	Government agencies Service providers Other actors	Allocate resources Establishing strategic and operational groups Establishing working plans Exchange information/knowledge
McCabe 2014	McCabe 2014	Aim 1: Confirm the feasibility of the partnership model (i.e., proof of concept). Aim 2: Develop and validate the training interventions. Aim 3: Explore methods of promoting sustainability and translational impact of the overall model.	USA	Mental health	Not reported	Coordination	Academic/research	Allocate resources Utilizing agreements/contracts Establishing working plans Gather data Support Exchange information/knowledge Train
Limaye 2018	Limaye 2018	The goals of this paper are to provide information on the first comprehensive air quality health risk communication and exposure mitigation plan in an Indian city, describe the challenges encountered, and highlight project aspects that may be adapted to other settings.	India	Living conditions/lifestyle habits	Not reported	Cooperation	Government agencies Academic/Research Service providers Additional civil society organizations	Allocate resources Establishing strategic and operational groups Gather data Exchange information/knowledge
Lee 2008	Lee 2008	This exploratory study describes the experiences of local government service providers and two NGOs in a context of long-standing internal armed conflict, how and to what extent provision has been affected by the conflict and what has been done to overcome its effects.	The Philippines	Maternal, adolescent, reproductive and child health	Not reported	Coordination		Allocate resources Establishing strategic and operational groups Exchange information/knowledge
Lawal 2022	Lawal 2022	This study examines the ways in which social and political accountability shaped the introduction, functioning, and stoppage of the CBHI programme.	Nigeria	Other	2007-2016	Not possible to judge	Companies	Allocate resources Gather data Exchange information/knowledge
Laughlin 2001	Laughlin 2001	Not reported	UK	Maternal, adolescent, reproductive and child health	Not reported	Cooperation	Government agencies Service providers	Gather data Exchange information/knowledge
Kusuma 2019	Kusuma 2019	To increase the dengue-related awareness and behavioural change through health education based intervention among the selected urban slum communities in Delhi.	India	Infectious disease	2013	Coordination	Companies Other actors	Allocate resources Establishing working plans Gather data Exchange information/knowledge
Kuo 2018	Kuo 2018	In this article, we focus our attention on the Los Angeles County (LAC) Department of Public Health’s (DPH’s) effort to implement the third CTG component.	USA	Living conditions/lifestyle habits	2011-2014	Not possible to judge	Government agencies Companies Other actors	Allocate resources Exchange information/knowledge
Kolbe 2015	Kolbe 2015	Not reported	USA	Living conditions/lifestyle habits	Not reported	Collaboration	Government agencies Academic/Research	Allocate resources Utilizing agreements/contracts Establishing strategic and operational groups Gather data Exchange information/knowledge
Jones 2010	Jones 2010	Not reported	USA	Maternal, adolescent, reproductive and child health	Not reported	Not possible to judge	Service providers Additional civil society organizations Other actors	Allocate resources Establishing strategic and operational groups Establishing working plans Gather data Exchange information/knowledge Train
Iyengar 2014	Iyengar 2014	This paper describes the resultant intervention that was implemented in 44 high workload public health facilities of 10 districts, and its impact on key inputs and maternal-newborn care practices.	India	Maternal, adolescent, reproductive and child health	2010-2012	Coordination	Additional civil society organizations Other actors	Establishing strategic and operational groups Gather data Exchange information/knowledge Train
Hernandez-Cordero 2011	Hernandez-Cordero 2011	This article describes how the Community mobilization plan was created, illustrates the use of evidence-based practices to lead to the development of the plan, outlines the plan’s community/organizational activities, and summarizes the principles and processes that can be replicated in other communities seeking to start their own community mobilization efforts to reduce youth violence.	USA	Living conditions/lifestyle habits	2004-2010	Collaboration	Government agencies Service providers Additional civil society organizations Community representatives Other actors	Allocate resources Utilizing agreements/contracts Establishing working plans Gather data Exchange information/knowledge
Haynes 2015	Haynes 2015	This study examined the differences between the Partnership Program, a collaborative program and the PHHV Program, a non-collaborative program.	USA	Maternal, adolescent, reproductive and child health	Not reported	Coordination	Service providers	Allocate resources Establishing working plans Exchange information/knowledge
Haya 2020	Haya 2020	We hypothesized that community-based participatory research (CBPR), which involves the community at every step, promotes effective program implementation and community empowerment. This study addressed the first step of CBPR, assessing community needs and developing tailored health program for a rural community in Japan.	Japan	Living conditions/lifestyle habits	2017-2018	Coordination	Academic/Research Other	Establishing strategic and operational groups Gather data Exchange information/knowledge
Harris 2012	Harris 2012	In this article, we describe the core interventions of the ICP, setting the background for its future evaluation that the authors are involved in. We consider the ways in which integration is being promoted and at which organizational and service levels, and we explore whether and how the organizational change will impact on patient care.	UK	Non-communicable disease	2011-Ongoing at time of publication	Collaboration	Service providers	Allocate resources Establishing strategic and operational groups Establishing working plans Gather data Exchange information/knowledge
Hamdani 2021	Hamdani 2021	This paper describes the process and outcomes of using the ToC approach to involve stakeholders to identify gaps in the implementation of the SMHP, and how these gaps could be addressed by developing contextually relevant interventions and harnessing multi-sectoral partnerships to deliver the SMHP at-scale in the public schools of rural Rawalpindi, Pakistan.	Pakistan	Mental health	Not reported	Cooperation	Government agencies Service providers Additional civil society organizations	Establishing working plans Gather data Exchange information/knowledge
Hall 1999	Hall 1999	Not reported	USA	Maternal, adolescent, reproductive and child health	Not reported	Collaboration	Government agencies Service providers Additional civil society organizations Community representatives Other actors	Allocate resources Establishing strategic and operational groups Gather data Exchange information/knowledge Train
Halkett 2010	Halkett 2010	The aim of the research was to find how a smokefree parks policy was conceived, accepted and developed by and for Kapiti Coast District Council.	New Zealand	Living conditions/lifestyle habits	2007-2008	Coordination	Government agencies Service providers	Allocate resources Establishing strategic and operational groups Establishing working plans Gather data Support Exchange information/knowledge
GyaltsenGongqueJianzan 2014	GyaltsenGongqueJianzan 2014	In this paper, we first describe the rural area where we have been working and outline the results of formative research we carried out there. Then we outline our approach to reducing maternal deaths there, briefly summarize results from an evaluation, and conclude by considering our approach in a larger context.	China	Maternal, adolescent, reproductive and child health	2003-Ongoing at time of publication	Not possible to judge	Academic/Research	Allocate resources Establishing working plans Exchange information/knowledge Train
Gidado 2020	Gidado 2020	This paper aims to describe the coordination process, design, and implementation of an integrated platform for diagnosis of TB and COVID-19, enabling factors and best practices, and report the current results of COVID-19, TB and HIV screening and testing including access to care.	Nigeria	Infectious disease	2020	Cooperation	Government agencies Other actors	Allocate resources Establishing working plans Gather data Support Exchange information/knowledge
Gany 2006	Gany 2006	Not reported	USA	Non-communicable disease	2000-2005	Not possible to judge	Government agencies Academic/Research Service providers Additional civil society organizations Companies Other actors	Allocate resources Utilizing agreements/contracts Establishing strategic and operational groups Establishing working plans Gather data Exchange information/knowledge Train
Gaite 2020	Gaite 2020	Therefore, the objectives set out in this work have been: • Outlining the profile of the group of young people who go through the educational measures in the Palencia City. • Analysing the uses and reasons that link adolescents and young people with alcohol consumption. • Knowing the assessment and perception that the participants have about the Socio-educational Program of Alternative Measures a…	Spain	Living conditions/lifestyle habits	2014-2018	Not possible to judge		Gather data Exchange information/knowledge
Foster 2021	Foster 2021	In this article, we explore novel community pharmacy practice models that address SDoH, provide real world examples of these models, and discuss potential pathways for reimbursement and sustainability.	USA	Other	Not reported	Not possible to judge	Service provider	Train
Folkerth 2020	Folkerth 2020	This case study provides an overview of the policy advocacy process and a detailed description of the steps taken to pass a comprehensive smoke-free policy in the rural Kentucky community of Williamstown.	USA	Living conditions/lifestyle habits	2017-2019	Coordination	Community representatives Other actors	Allocate resources Utilizing Agreements/contracts Gather data Exchange information/knowledge Train
Fasawe 2020	Fasawe 2020	This paper uses the Networks of Care Framework to describe two Networks of Care (NOC) in Nigeria.	Nigeria	Maternal, adolescent, reproductive and child health	2014-2016	Collaboration	Government agencies Service providers Additional civil society organizations Community representatives Other actors	Allocate resources Establishing working plans Gather data Exchange information/knowledge Train
Everingham 2012	Everingham 2012	this article aims to explore the second set of questions, and specifically assumptions underpinning collaboration between local government and the community sector.	Australia	Other	Not reported	Coordination	Government agencies Service providers Other actors	Establishing strategic and operational groups Establishing working plans Gather data Exchange information/knowledge
Evensen 2010	Evensen 2010	This article examines the political dynamics associated with the initiation of the Lusikisiki programme, the mobilisation of local communities, and the transition from pilot project to public sector programme for HIV/AIDS treatment.	South Africa	Infectious disease	Not reported	Not possible to judge	Government agencies Additional civil soceity organizations Other actors	Allocate resources Gather data Support Train
Erens 2020	Erens 2020	This analysis tracks the Pioneers’ self-reported progress, and the facilitators and barriers to improve service coordination over three years, longer than previous evaluations in England. The paper aims to discuss these issues.	UK	Other	2013-2018	Not possible to judge	Government agencies Service providers	Allocate resources Exchange information/knowledge
Douglas 2002	Douglas 2002	This paper presents not only a description of the early implementation of this intervention, but also provides an outline of its evaluation, and some of the main findings arising from this work	UK	Other	2000	Coordination	Service providers Additional civil society organizations Community representatives	Allocate resources Gather data Exchange information/knowledge
Deegan 2022	Deegan 2022	This paper provides an overview of an ongoing cross-sectoral partnership with one rural BC community to develop and implement a Heat Alert and Response System (HARS).	Canada	Living conditions/lifestyle habits	2018-Ongoing at time of publication	Coordination	Government agencies Service providers Community representatives Other actors	Allocate resources Establishing strategic and operational groups Establishing working plans Gather data Exchange information/knowledge
Compagni 2011	Compagni 2011	The aim of the present study was to investigate which elements within policy guidelines might affect the fina scope of MH networks through interplay with local dynamics.	Italy	Mental health	Not reported	Cooperation		Allocate resources Establishing strategic and operational groups Exchange information/knowledge
Christensen 2019	Christensen 2019	The aim of the paper is to describe and discuss the strengths, weaknesses and challenges of HiAP-inspired local efforts to “build alliances and supportive environments for health” within the framework of an inter-organisational community-based health promotion network	Denmark	Living conditions/lifestyle habits	Not reported	Not possible to judge	Government agencies Academic/Research Service providers Other actors	Exchange information/knowledge
Cech 2017	Cech 2017	The purpose of this case report is to describe the development of a sustained collaboration between CCI and Ecuadorian partners in improving the health, social inclusion, and quality of life for individuals with disabilities in Ecuador.	Ecuador	Other	Not reported	Cooperation	Government agencies Academic/Research Additional civil society organizations	Allocate resources Utilizing agreements/contracts Support Exchange information/knowledge Train
Carneiro 2019	Carneiro 2019	To describe two innovative Brazilian programs relating to non communicable diseases that were presented at the World Health Organization (WHO) 2017 Global Conference.	Brazil	Living conditions/lifestyle habits	2015-Ongoing at time of publication	Not possible to judge	Academic/Research Companies Other actors	Allocate resources Establishing working plans Exchange information/knowledge Train
Bynner 2022	Bynner 2022	The aim of this research was to collect empirical evidence about local service responses to the COVID-19 pandemic.	UK	Infectious disease	Not reported	Not possible to judge		Allocate resources Exchange information/knowledge
Buchanan 2001	Buchanan 2001	Not reported	USA	Other	Not reported	Cooperation	Government agencies Academic/Research Other actors	Allocate resources Establishing strategic and operational groups Gather data Exchange information/knowledge
Bravo 2019	Bravo 2019	Not reported	USA	Non-communicable disease	2014-2016	Not possible to judge	Other actors	Allocate resources Establishing strategic and operational groups Gather data Exchange information/knowledge Train
Bhatta 2020	Bhatta 2020	Not reported	Nepal	Maternal, adolescent, reproductive and child health	Not reported	Collaboration	Government agencies Service providers Community representatives Other actors	Allocate resources Utilizing agreements/contracts Gather data Exchange information/knowledge Train
Bar 2018	Bar 2018	Not reported	Canada	Other	2007-Ongoing at time of publication	Not possible to judge	Government agencies Service providers Other actors	Allocate resources Establishing strategic and operational groups Support Exchange information/knowledge Train
Arroz 2018	Arroz 2018	The aim of this report is to describe the planning and implementation process of the universal coverage campaign in Mozambique during 2016 and 2017. The specific objectives are: (i) to describe the planning process; (ii) to describe the implementation outcomes of the intervention; (iii) to document and share challenges and lessons learned during the campaign planning and implementation.	Mozambique	Infectious disease	2016-2017	Not possible to judge	Government agencies Additional civil society organizations Community representatives Other actors	Establishing strategic and operational groups Gather data Exchange information/knowledge Train
Arriola 2001	Arriola 2001	This article presents a model approach to the problem of health disparities by forging this type of collaboration. It also presents preliminary findings based on disease screening and treatment data as an illustration of how collaborative relationships can promote the reduction of racial/ ethnic health disparities	USA	Infectious disease	Not reported	Not possible to judge	Government agencies Academic/Research Service providers	Allocate resources Gather data Exchange information/knowledge
Ancarani 2015	Ancarani 2015	Not reported	Italy	Non-communicable disease	Not reported	Collaboration		Establishing strategic and operational groups Gather data Exchange information/knowledge Train
Allaby 2005	Allaby 2005	This article describes the response of the Yala Urban Health Programme and its predecessors to urban health problems in Patan, Nepal, over 20 years.	Nepal	Other	1998-Ongoing at time of publication	Collaboration	Service providers Other actors	Allocate resources Utilizing agreements/contracts Establishing strategic and operational groups Establishing working plans Gather data Support Exchange information/knowledge Train
Abdullahi 2020	Abdullahi 2020	Here, we present the results of a public–private partnership approach delivered through a collaboration between state HIV and TB entities, 4 community-based organizations (CBOs), and community, tribal, IDP and religious leaders in Adamawa, Gombe, and Yobe states.	Nigeria	Infectious disease	2017-2018	Coordination	Government agencies Service providers Other actors	Allocate resources Establishing strategic and operational groups Gather data Exchange information/knowledge Train
Aasland 2022	Aasland 2022	This article describes and analyses the coordination work between central and local levels in crisis management by studying the Norwegian county governors' inclusion of voluntary organisations in the County Emergency Council (CEC) in the first months of the COVID-19 pandemic.	Norway	Infectious disease	Not reported	Cooperation		Allocate resources Exchange information/knowledge
Hushie 2016	Hushie 2016	This study’s aim was to provide an investigation of the processes and elements of these partnerships and their advantages and disadvantages.	Ghana	Maternal, adolescent, reproductive and child health	2009-2011	A: Collaboration	Other actors	Allocate resources Utilizing agreements/contracts Gather data Support Exchange information/knowledge Train
Hushie 2016	Hushie 2016			Infectious disease	2005-2006	B: Coordination	Government agencies Additional civil society organizations	Allocate resources Gather data Exchange information/knowledge
Hushie 2016	Hushie 2016			Maternal, adolescent, reproductive and child health	2007-2010	C: Coordination	Additional civil society organizations	Allocate resources Establishing working plans Gather data Support Exchange information/knowledge
Hushie 2016	Hushie 2016			Other	1996-Ongoing at time of publication	D: Collaboration		Allocate resources Utilizing agreements/contracts Establishing strategic and operational groups Gather data Exchange information/knowledge Train
Hushie 2016	Hushie 2016			Mental health	2002-Ongoing at time of publication	E: Collaboration	Government agencies	Allocate resources Utilizing agreements/contracts Gather data Exchange information/knowledge Train
